# Supplementary material
Source: PubMed Central journal article supplement (PMC7864878)
Supplement: NIHMS1649632-supplement-1.pdf [file NIHMS1649632-supplement-1.pdf]

## Supplemental Figures

Figure S1:

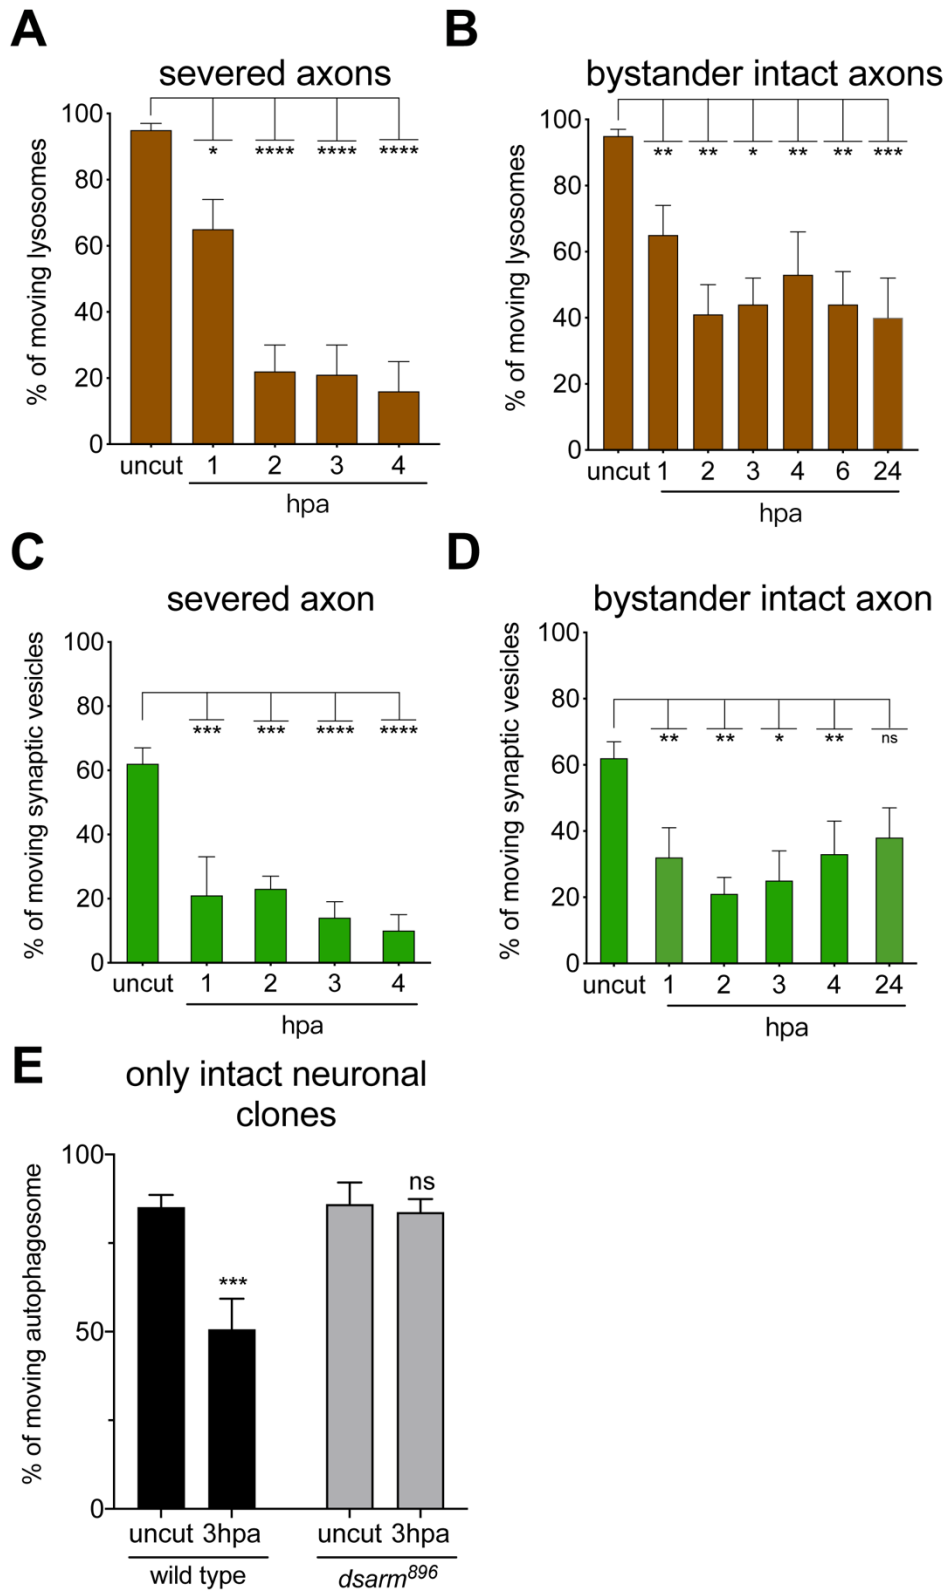

**Figure. S1: Nerve injury blocks trafficking of lysosomes and synaptic vesicles in both severed and intact axons. (Related to Figure 1)**

(A, B) Injury reduced the percentage of moving lysosomes in both severed axons and proximal intact axons. hpa, hours post axotomy. (For all, Ordinary one-way ANOVA with Sidak multiple comparisons test. \* $p < 0.05$ , \*\* $p < 0.01$ , \*\*\* $p < 0.001$ , \*\*\*\* $p < 0.0001$ ,  $n = 10$  axons of each, Error bar = S.E.M.).

(C, D) Injury reduced the percentage of moving synaptic vesicles in both severed axons and proximal intact axons.

(E) Axon transport quantification in the wings with intact clones only. Two-way ANOVA with Sidak multiple comparisons test. (ns = not significant, \*\*\* $p < 0.001$ ,  $n = 7$  to 14 axons each, Error bar = S.E.M.).

Figure S2:

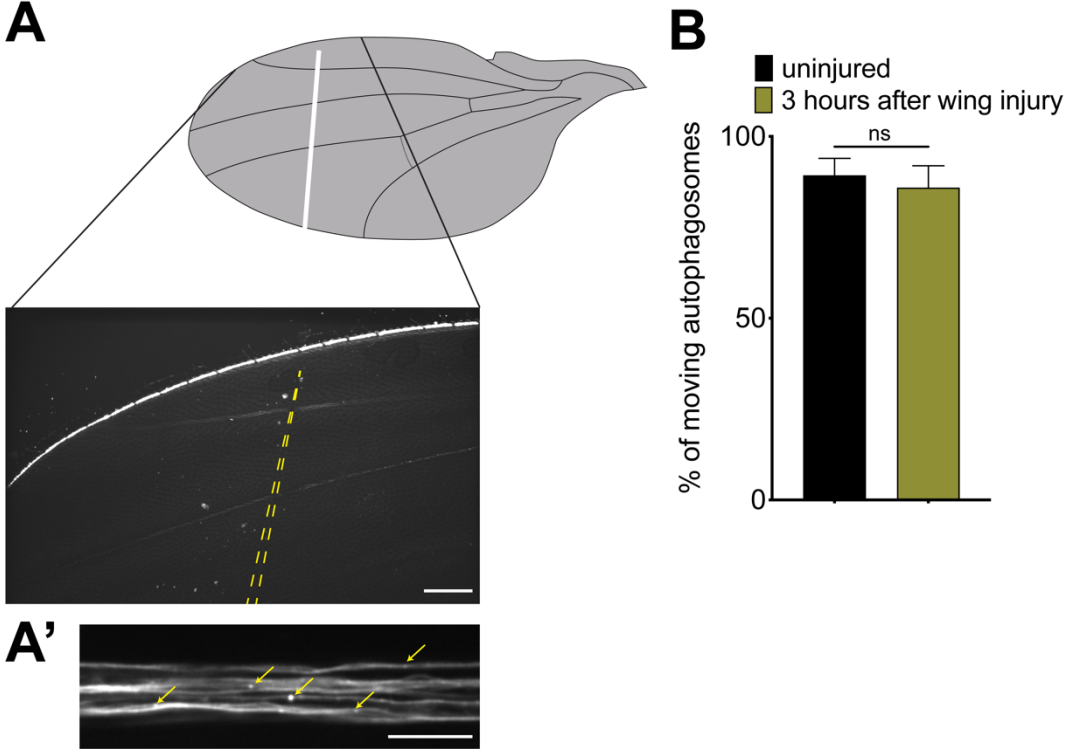

**Figure. S2: Wing injury, instead of nerve injury, is not sufficient to induce axon transport suppression. (Related to Figure 1)**

(A) Schematics and representative image indicate wing injury site. Yellow dash lines outline the the injury site. Scale bar = 100  $\mu\text{m}$ . (A') Higher magnification image of the GFP-labeled axons in the wing margin. Autophagosomes were labeled with mCherry, and indicated by yellow arrows. Scale bar = 10  $\mu\text{m}$ .

(B) Axon transport quantification in the wings before and after injury. Unpaired two-tailed t-test. (ns = not significant, n = 8 axons each, Error bar = S.E.M.).

Figure S3:

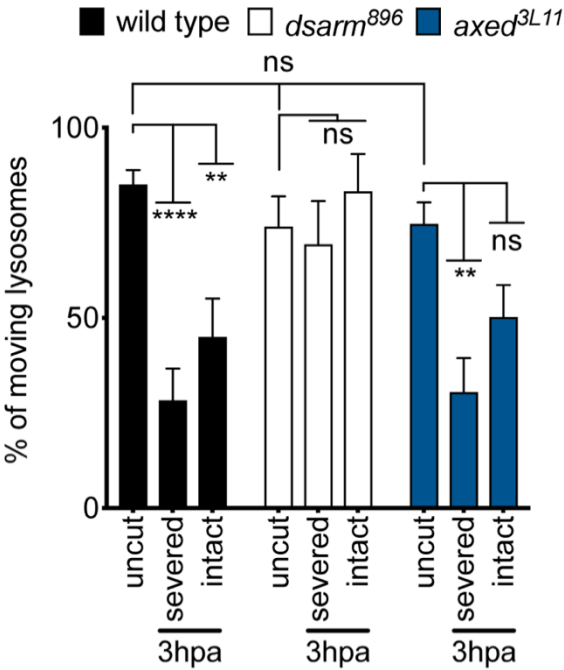

**Figure S3: dSarm, but Axed, is required for the blockade of vesicle trafficking in both severed and intact axons after nerve injury. (Related to Figure 2-4)**

Lysosome trafficking in axons was suppressed in control and *axed* mutant animals 3hpa, but not in *dsarm* (*dsarm*<sup>896</sup>) null mutants. Two-way ANOVA with Sidak multiple comparisons test. (ns = not significant, \*\*\*p < 0.001, \*\*\*\*p < 0.0001, n = 10 axons of each, Error bar = S.E.M.).

**Figure S4:**

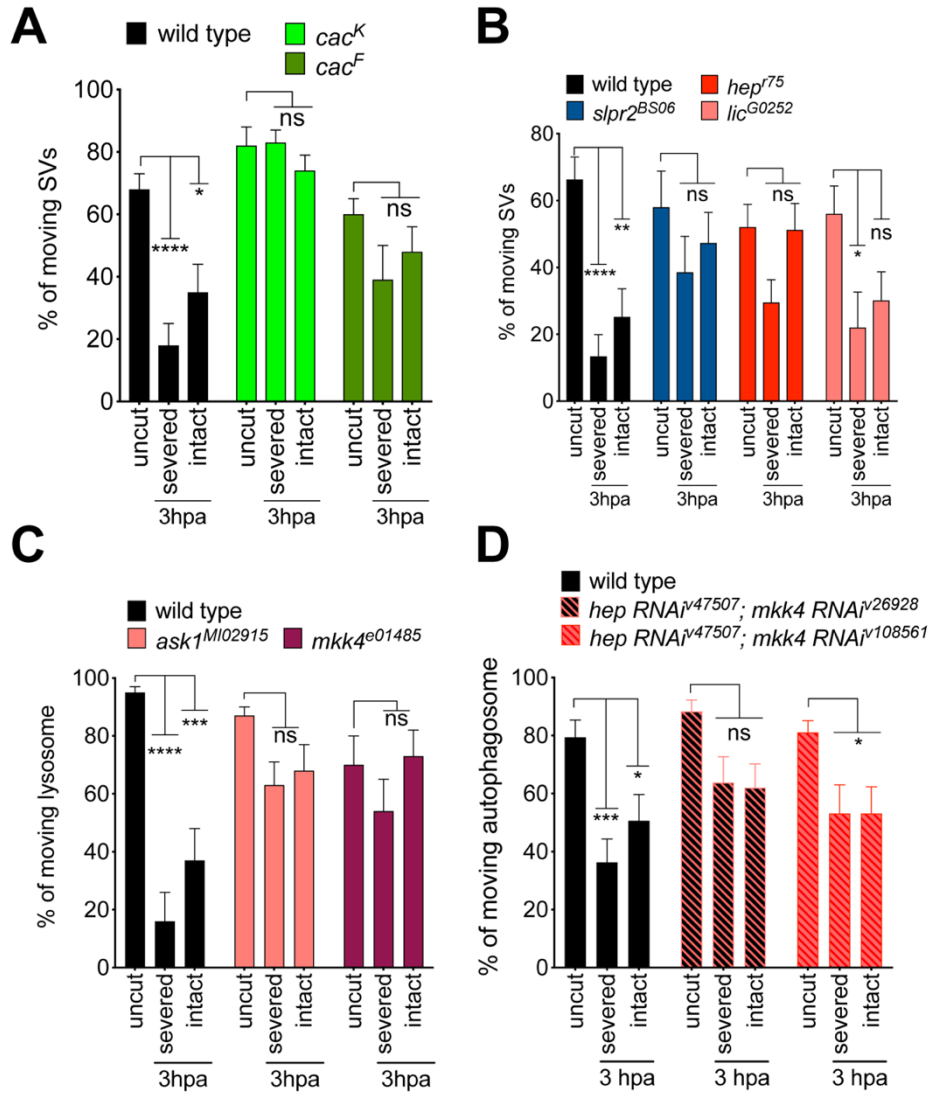

**Figure S4: Cacophony and the TIR-1-like-MAPK signaling pathway promote blockade of lysosome and SV trafficking after nerve injury. (Related to Figure 4)**

(A) Synaptic vesicle movement in the two independent alleles of *cac* (*cac<sup>K</sup>* and *cac<sup>F</sup>*) in both severed axons and proximal intact axons in injured wings (3hpa). (For all, two-way ANOVA with Sidak multiple comparisons test. ns = not significant, \*p < 0.05, \*\*p < 0.01, \*\*\*p < 0.001, \*\*\*\*p < 0.0001, n = 10 axons of each, Error bar = S.E.M.).

(B) Strong alleles of *mkk4* and *ask1*, (*mkk4<sup>e01485</sup>*, and *ask1<sup>M102915</sup>*) exhibited normal lysosome transport in both severed axons in injured wings 3hpa compared to uninjured wings.

(C) In severed axons, synaptic vesicle movement was not significantly changed in *slpr* or *hep* (*slpr<sup>BS06</sup>* and *hep<sup>r75</sup>*) mutant axons (3hpa) compared to uninjured wings (uncut). An allele of *lic*, (*lic<sup>G0252</sup>*) showed a mild reduction in trafficking after injury compared to uninjured wings.

(D) The axon clones with double RNAi knockdown of *mkk4* and *hep* (*hep RNAi<sup>v47507</sup>* and *mkk4 RNAi<sup>v26928</sup>*) showed no significant suppression of axon transport after injury (middle group). Two alleles of *mkk4* RNAi were tested (*mkk4 RNAi<sup>v26928</sup>* and *mkk4 RNAi<sup>v108561</sup>*). To enhance the RNAi efficiency, *5xuas-Gal4* was included in all groups.



**Figure S5:**

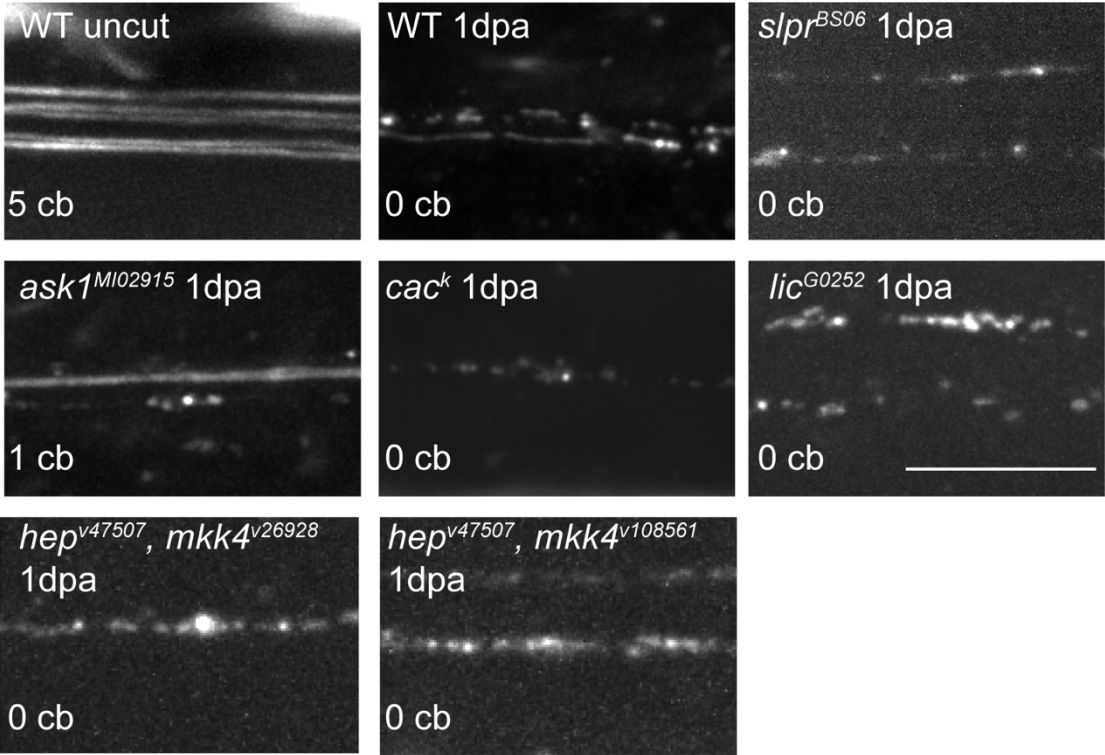

**Figure S5: Loss of MAPK components does not suppress axon degeneration.  
(Related to Figure 4)**

Loss of function mutations in *slpr*, *ask1*, *cac*, and *lic*, and *mkk4*, *hep* double RNAi knockdown (*hep RNAi<sup>v47507</sup>*, *mkk4 RNAi<sup>v26928</sup>* and *hep RNAi<sup>v47507</sup>*, *mkk4 RNAi<sup>v108561</sup>*) with *5xuas-Gal4*, are unable to suppress axon degeneration even at 1 day post axotomy (dpa). The number of remaining cell bodies (cb), and therefore predicted axon number were indicated at lower left corner. Scale bar = 10 um.

**Figure S6:**

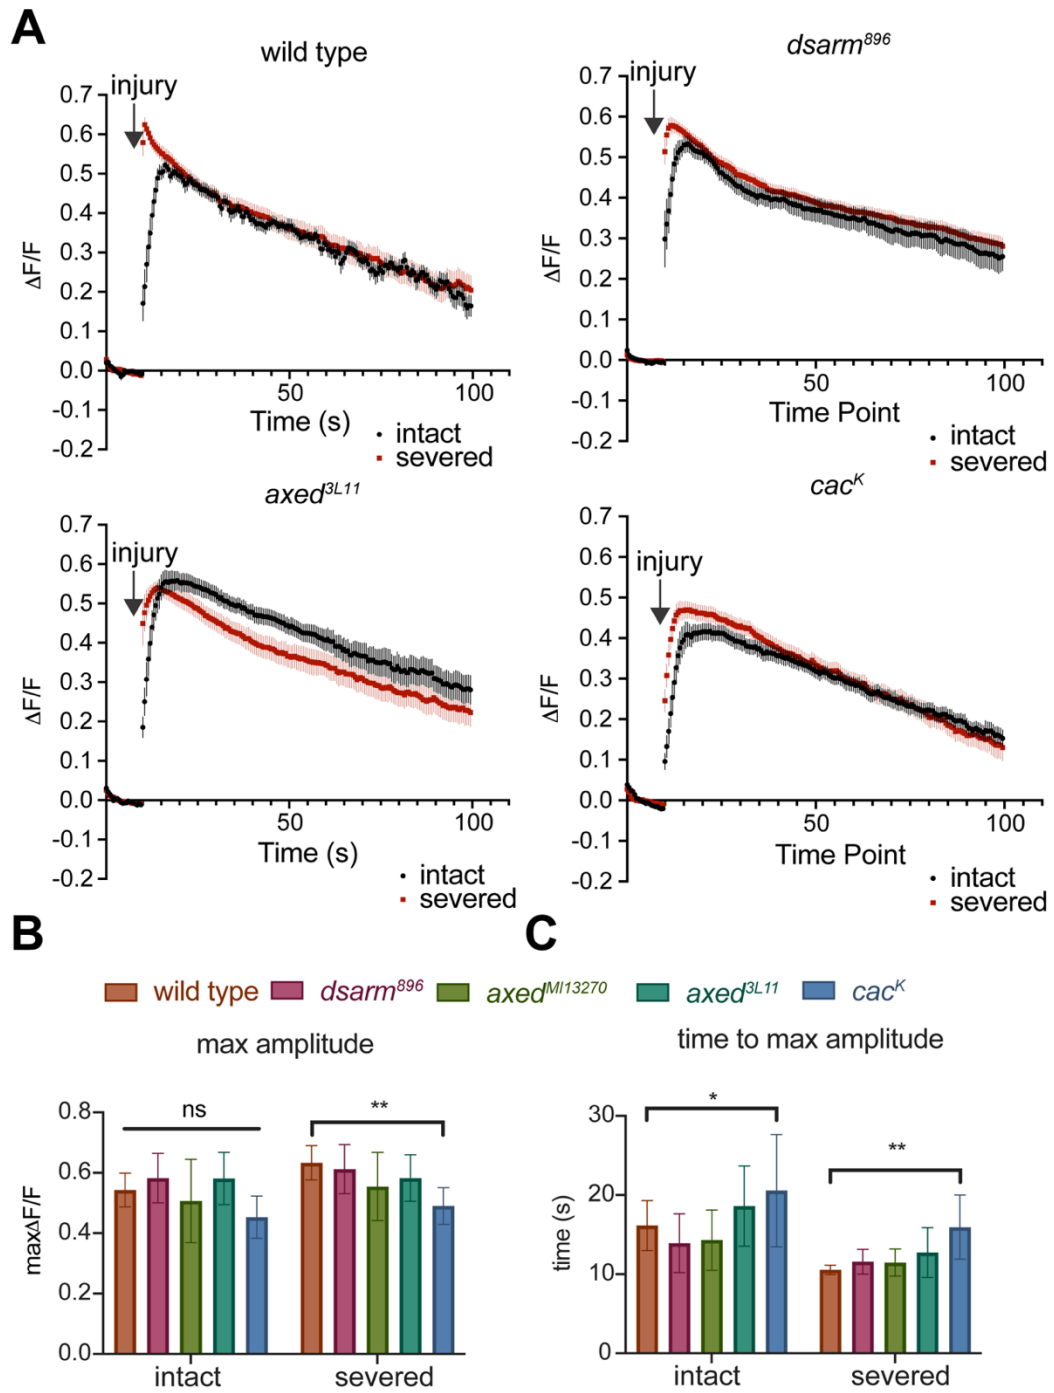

**Figure S6: Increase of calcium influx in severed and intact axons after axotomy is mildly reduced in *cacophony* mutants. (Related to Figure 4)**

(A) The GCamp6s signal intensity in different genotypes over time after injury is plotted. (Error bar = S.E.M., n = 9-15 wings)

(B, C) Maximum amplitude (B) and time to max amplitude (C) of GCamp6s intensity after injury in different genotypes. Two-way ANOVA with Sidak multiple comparisons test. (ns = not significant, \*p < 0.05, \*\*p < 0.01, n = 9-15 wings. Error bar = S.E.M.).

**Figure S7:**

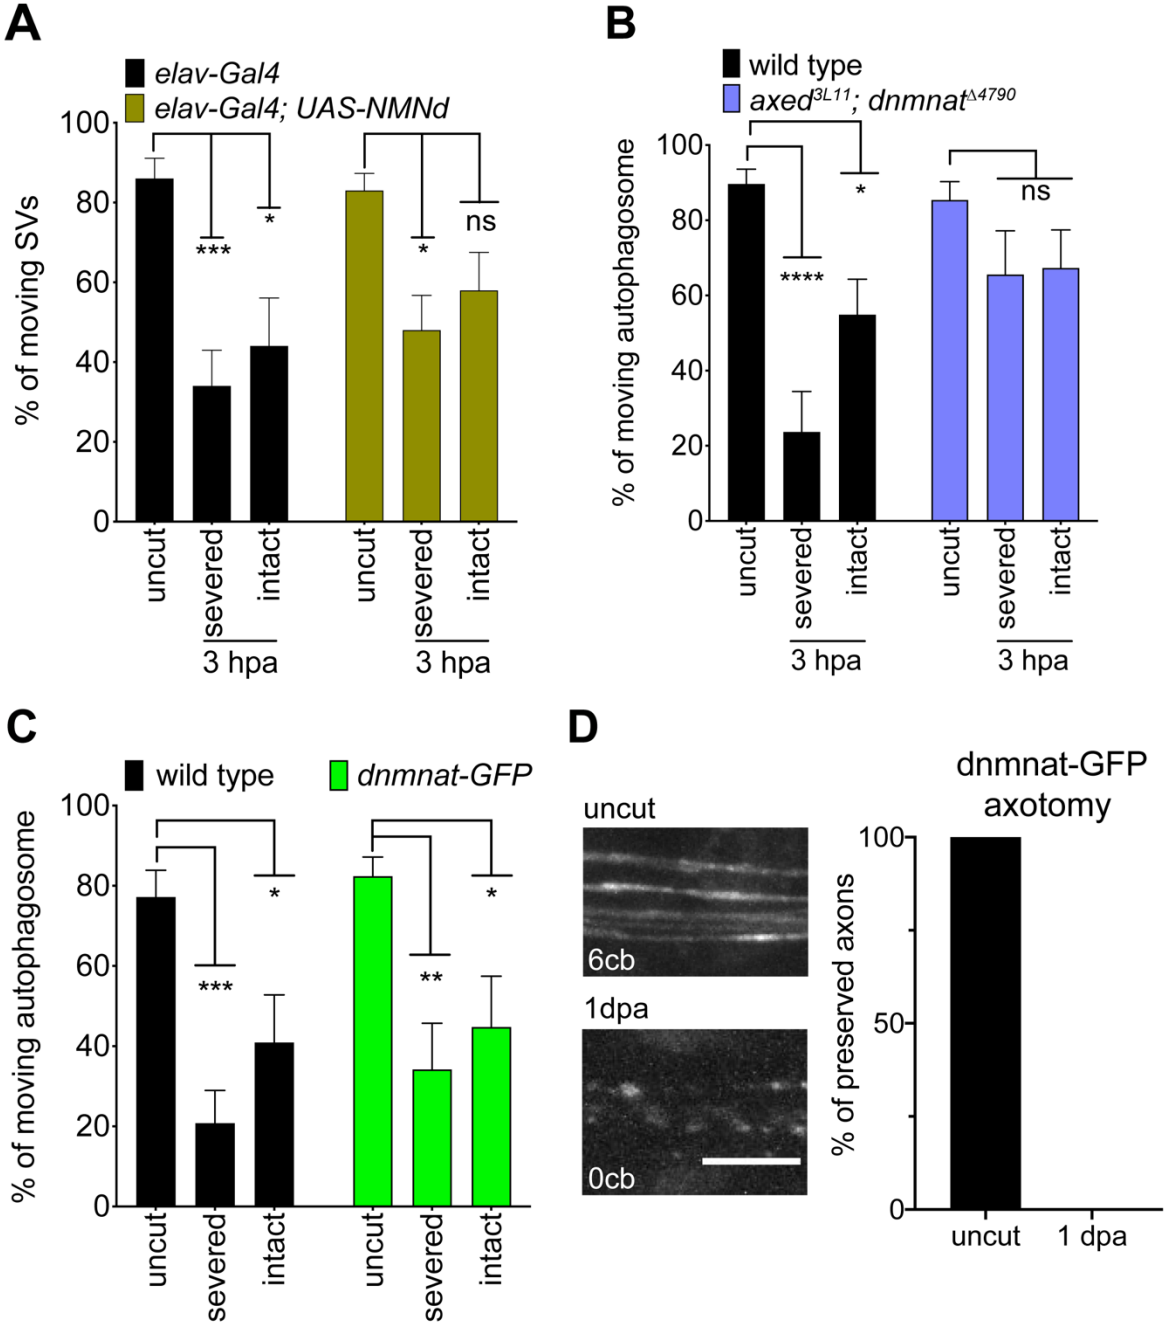

**Figure S7: NMN deamidase expression does not modify injury-induced suppression of axon transport and dNmnat levels to not drop in bystander neuron cell bodies. (Related to Figures 5.)**

(A) Severed and intact axons expressing NMN deamidase (NMNd) showed partial decrease of axon transport after axonal injury 3hpa compared to that in uninjured wings. Two-way ANOVA with Sidak multiple comparisons test. (ns = not significant, \*\*p < 0.01, \*p < 0.05, n = 10~20 axons of each, Error bar = S.E.M.).

(B) The severed and intact *axed*<sup>3L11</sup>, *dnmnat*<sup>Δ4790</sup> clones showed no reduction of axon transport after axonal injury 3hpa when comparing to uninjured wings. Two-way ANOVA with Sidak multiple comparisons test. (ns = not significant, \*\*\*\*p < 0.0001, \*p < 0.05, n = 10~20 axons of each, Error bar = S.E.M.).

(C) The axon clones with endogenously GFP labeled dNmnat (dNmnat-GFP) showed suppression of axon transport, which is similar to wild type axon clones. Two-way ANOVA with Sidak multiple comparisons test. (ns = not significant, \*\*\*p < 0.001, \*\*p < 0.01, \*p < 0.05, n = 10~20 axons of each, Error bar = S.E.M.).

(D) dNmnat-GFP axon clones showed normal axon degeneration after axotomy. Scale bar = 5μm, dpa = days post axotomy, cb = cell body. (100% of preserved axons before injury, and 0% of preserved axons on 1dpa, n = 20 wings).

**Figure S8:**

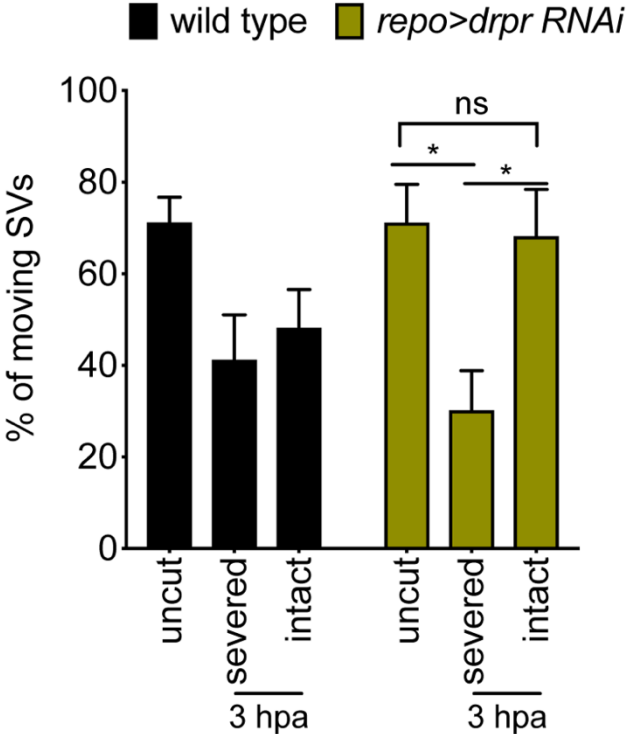

**Figure S8: Draper functions in glia to suppress axon transport in the intact neurons. (Related to Figures 7)**

Severed axons, but not intact axons, showed decrease of synaptic vesicle (SV) transport after axonal injury 3hpa in glial-specific draper knockdown flies (*repo-gal4, uas-drpr<sup>RNAi</sup>*). Two-way ANOVA with Sidak multiple comparisons test. (ns = not significant, \*\*p < 0.01, \*p < 0.05, n = 10~20 axons of each, Error bar = S.E.M.).



**Figure S9:**

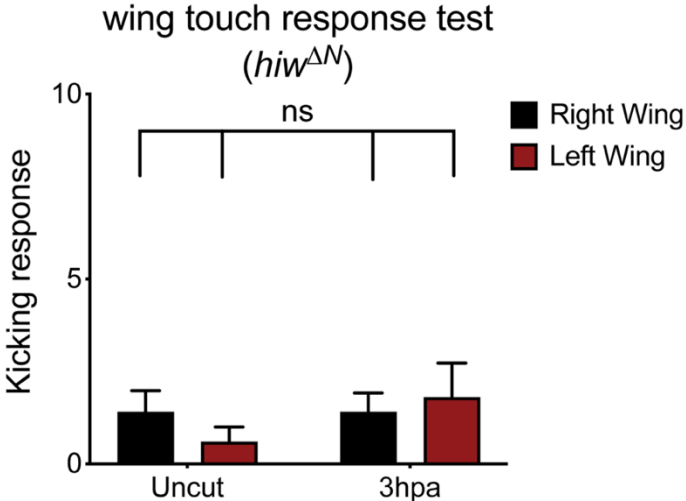

**Figure S9. *hiw*<sup>ΔN</sup> mutant showed defective kicking responses after gentle touch. (Related to Figure 6)**

Uncut: Both side of the wings are intact. 3hpa: Right wings are intact, but the left wings are injured. *hiw*<sup>ΔN</sup> mutant showed defective kicking responses upon bristle stimulation even in the animals without any injury. Two-way ANOVA with Sidak multiple comparisons test. (ns = not significant, n = 13~14 animals of each, Error bar = S.E.M.).
